# Supplementary material for: An integrated Asian human SNV and indel benchmark established using multiple sequencing methods
Source: PubMed Central journal article supplement (PMC7300012; doi:10.1038/s41598-020-66605-6), 2020-06-17
Supplement: 41598_2020_66605_MOESM1_ESM.pdf [file 41598_2020_66605_MOESM1_ESM.pdf]

# **An integrated Asian human SNV and indel benchmark established using multiple sequencing methods**

Chuanfeng Huang<sup>1, \*</sup>, Libin Shao<sup>2, \*</sup>, Shoufang Qu<sup>1, \*</sup>, Junhua Rao<sup>3, \*</sup>, Tao Cheng<sup>4</sup>, Zhisheng Cao<sup>5</sup>, Sanyang Liu<sup>6</sup>, Jie Hu<sup>2</sup>, Xinming Liang<sup>3</sup>, Ling Shang<sup>4</sup>, Yangyi Chen<sup>7</sup>, Zhikun Liang<sup>8</sup>, Jiezhong Zhang<sup>6</sup>, Peipei Chen<sup>5</sup>, Donghong Luo<sup>7</sup>, Anna Zhu<sup>8</sup>, Ting Yu<sup>1</sup>, Wenxin Zhang<sup>1</sup>, Guangyi Fan<sup>2,9,10</sup>, Fang Chen<sup>3, †</sup>, Jie Huang<sup>1, †</sup>

1. National Institutes for food and drug Control (NIFDC), No.2, Tiantan Xili Dongcheng District, Beijing 10050, P. R. China
2. BGI-Qingdao, BGI-Shenzhen, Qingdao, Shandong, 266555, P. R. China
3. MGI, BGI-Shenzhen, Shenzhen, Guangdong, 518083, P. R. China
4. BerryGenomics Co., Ltd. Building #5, 4 Science Park Road, ZGC Life Science Park, Beijing, 102200, P. R. China
5. Tianjin Novogene Bioinformatic Technology Co., Ltd. Entrepreneurial Headquarters Base B07-B09, Wuqing Development Zone, Tianjin, 301700, P. R. China
6. Annoroad Gene Technology, Building B1, Yard 88, kechuang 6 Rd, Beijing Economic-Technological Development Area, Beijing, 102200, P. R. China
7. CapitalBio Genomics Co., Ltd., Building 11, GuanTai Biotechnology Cooperation Incubation Center, No.1, Taoyuan Road, Songshan Lake Hi-Tech Industrial Development Zone, Dongguan, Guangdong, 523808, P.R. China
8. Guangzhou Daruia Biotechnology Co. Ltd., 5 buildings No. 11 Nanxiang Third Road, Science City, Luogang District, Guangzhou, Guangdong, 510663, P.R. China
9. BGI-Shenzhen, Shenzhen, Guangdong, 518083, P.R. China
10. China National GeneBank, BGI-Shenzhen, Shenzhen Guangdong, 518120, P.R. China

\*These authors contributed equally to this work.

†Correspondence authors: Fang Chen (fangchen@genomics.cn) and Jie Huang (jhuang5522@126.com)

**Supplementary Figure S1. Sequencing depth, duplicate and mapping coverage.**

**Supplementary Figure S2. Saturate analysis for SNV, Indel and coverage for MPS platforms.**

**Supplementary Figure S3. The Indel quality distribution along with sequencing depth increasing**

**Supplementary Figure S4. The Indel precision distribution along with sequencing depth increasing.**

**Supplementary Figure S5. Consistency of SNV from BGI and Illumina short sequence reads.**

**Supplementary Figure S6. IGV views NAIP gene for each platform.**

**Supplementary Figure S7. IGV views XAGE2 gene for each platform.**

**Supplementary Figure S8. All and platform unique SNV quality distribution for long fragment and short fragment platforms.**

**Supplementary Table S1-1. Data information of each platforms.**

**Supplementary Table S1-2. Data information of each platforms.**

**Supplementary Table S1-3. Data information of each platforms.**

**Supplementary Table S2. Statistics of blind zones.**

**Supplementary Table S3. Information of blind zones.**

**Supplementary Table S4. Phasing statistic for PacBio HiFi CCS and stLFR data.**

**Supplementary Table S5. Statistics of Allele frequency less than 1% in 1000 Genome database.**

**Supplementary Table S6. SNV and SNV density detected in blind zones and UMRs.**

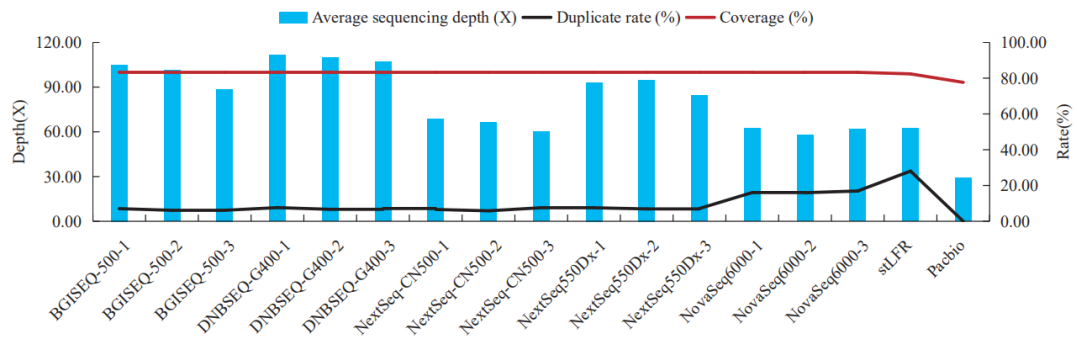

**Supplementary Figure S1. Sequencing depth, duplicate and coverage.** For each platform and technical replicate sample, histograms indicate the sequencing depth, duplicate rate and coverage are represented by black and red line respectively.

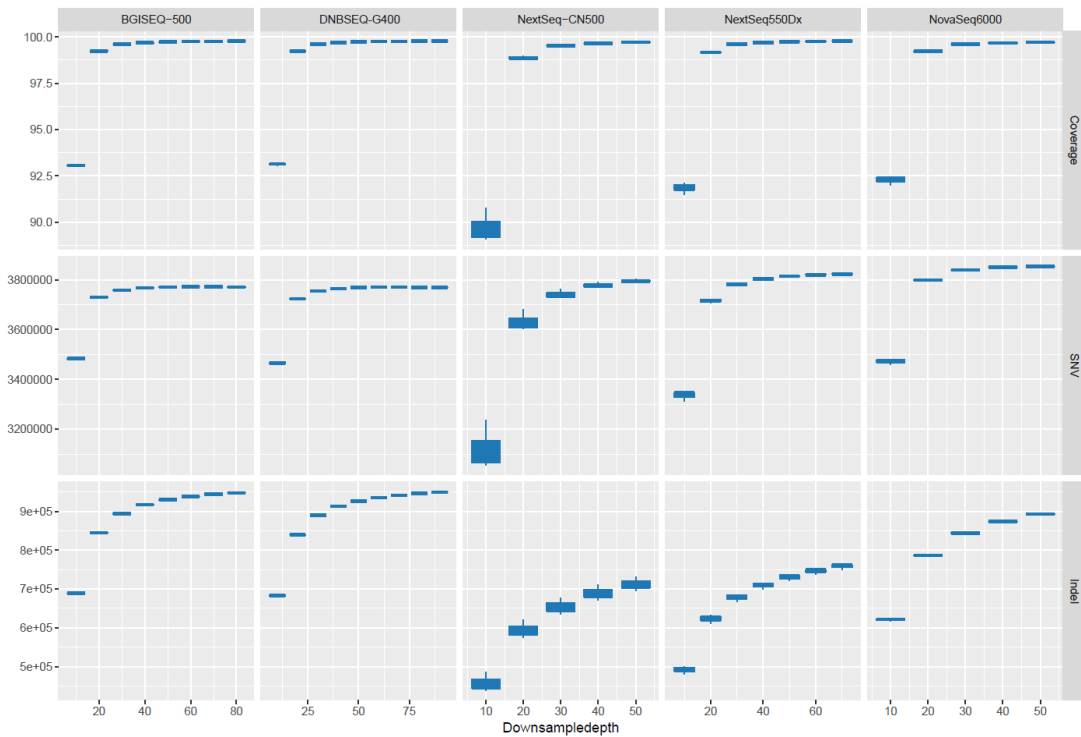

**Supplementary Figure S2. Saturation analysis for SNV, Indel and coverage for MPS platforms.** Each window shows average number for coverage, SNV and Indel Numbers correspond to Sequencing depth from BGISEQ-500, DNBSEQ-G400, NextSeq-CN500, NextSeq 550DX and NovaSeq6000 platforms.

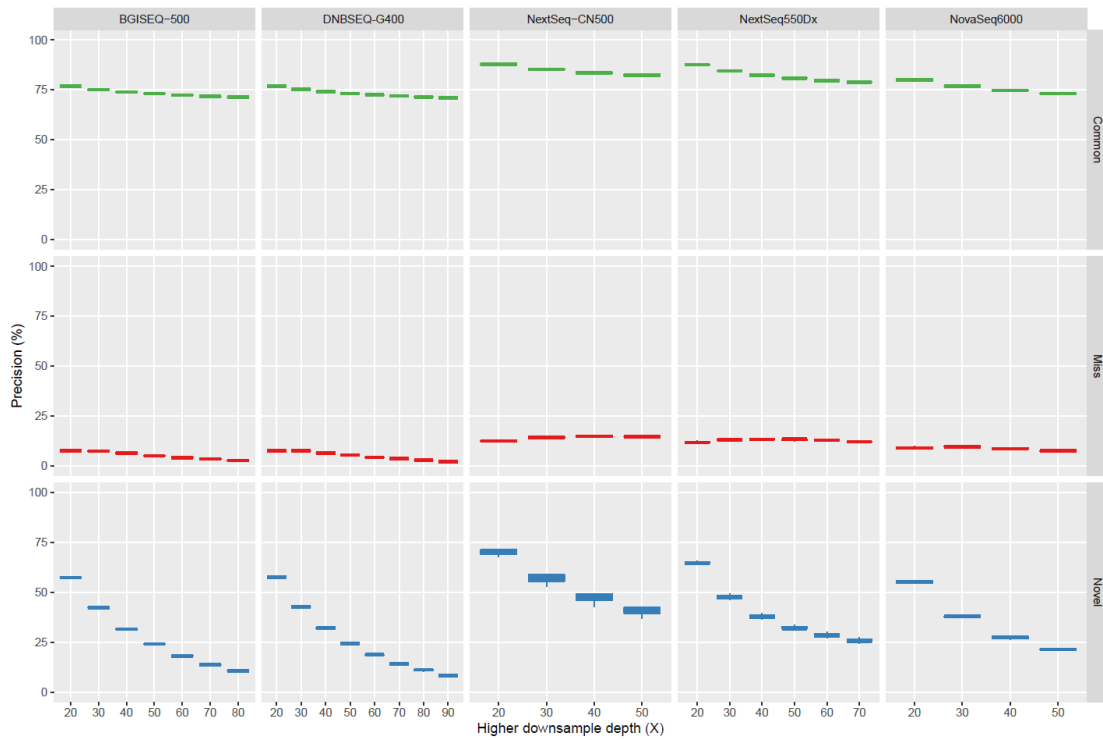

**Supplementary Figure S3. The Indel quality distribution along with sequencing depth increasing.** Three types Indel, common, missed and novel are shown in each round, and the dark line in the picture indicate the quality of final Indel set.

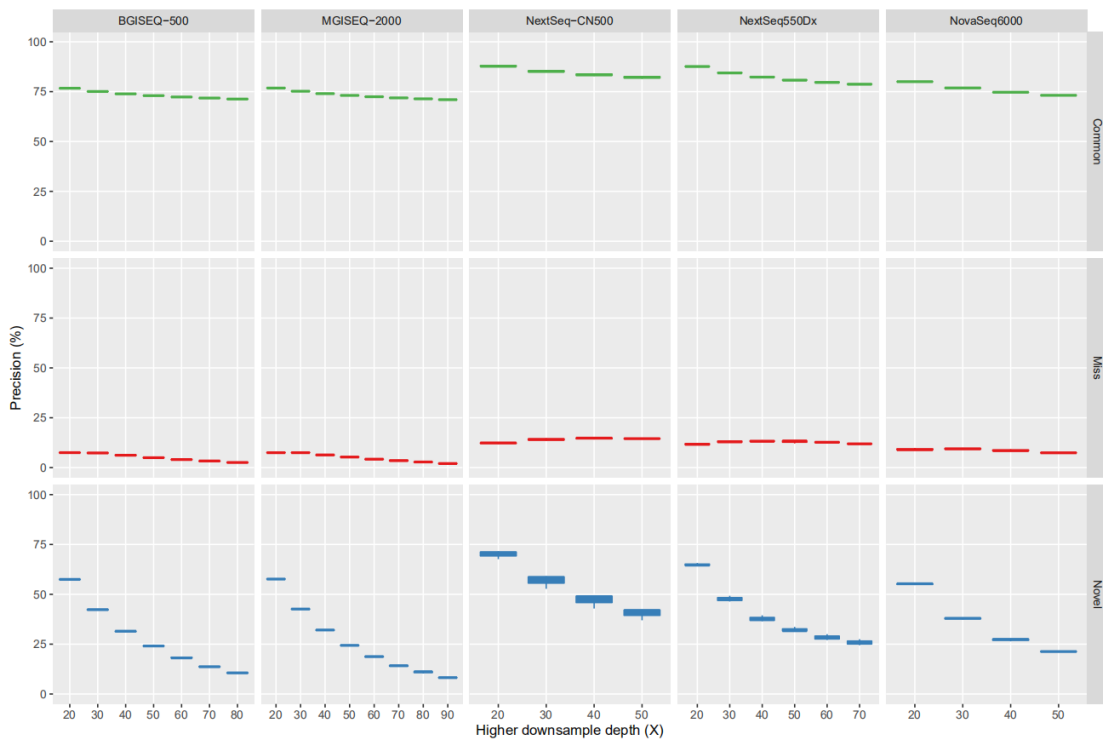

**Supplementary Figure S4. The Indel precision distribution along with sequencing depth increasing.** Common, missed and novel Indel classified in each round.

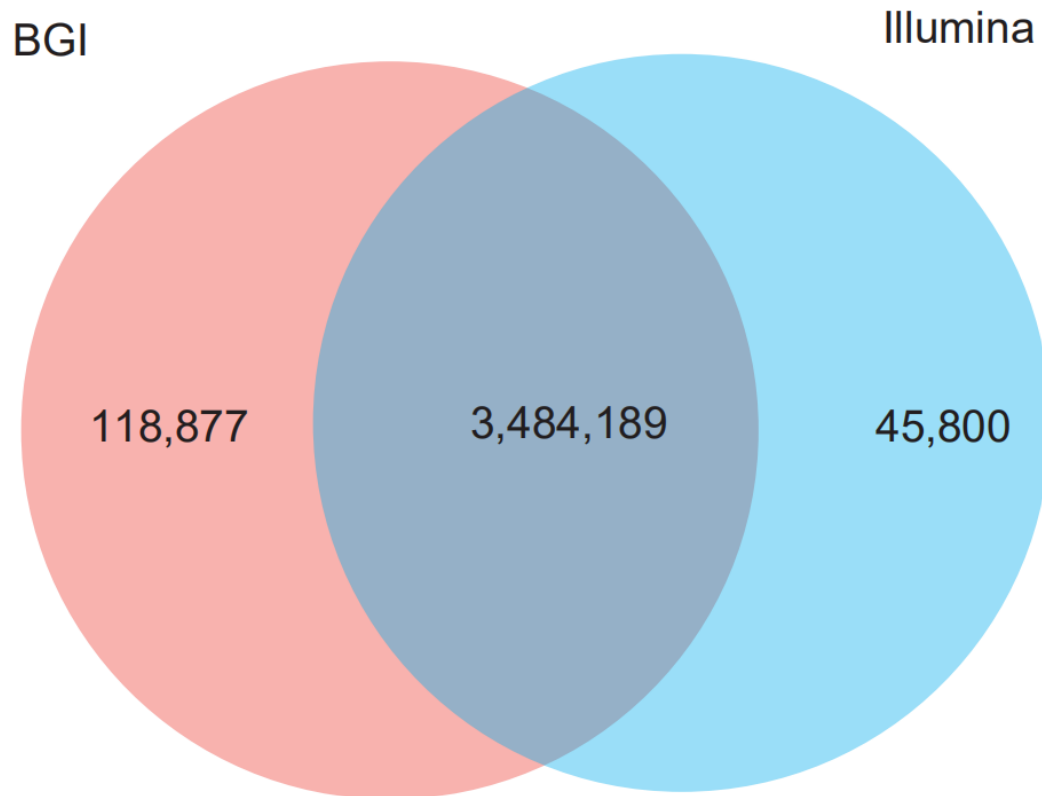

**Supplementary Figure S5. Consistency of SNV from BGI and Illumina short sequence reads.** SNV consistency, supported by all samples for BGI and Illumina platforms are shown.

NAIP(chr5:70,264,310-70,320,941)

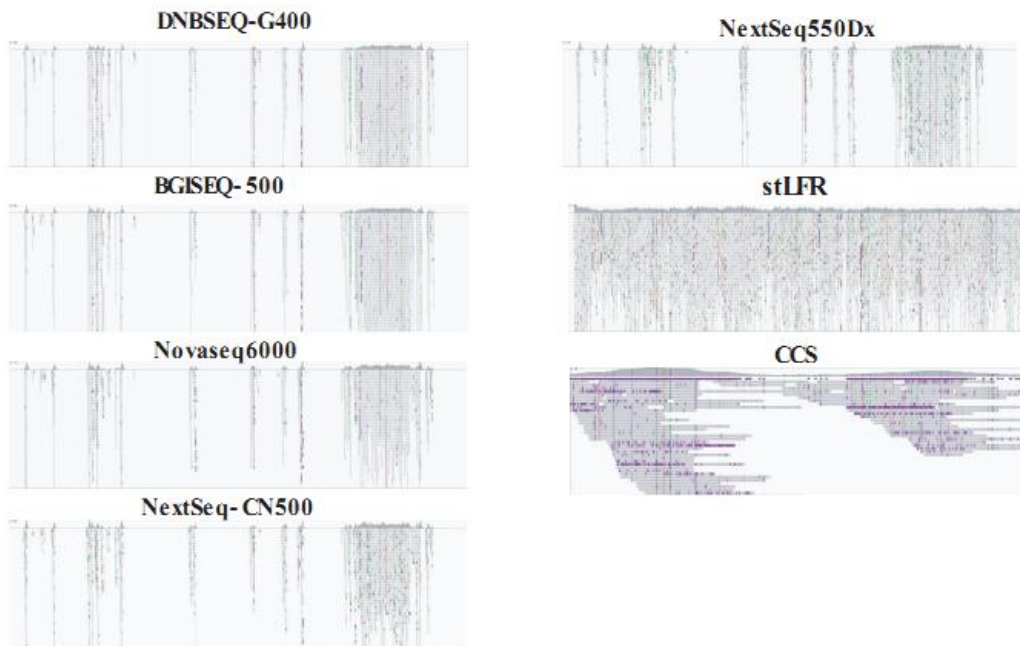

Supplementary Figure S6. IGV views NAIP gene for each platform.

XAGE2 (chrX:52,112,000-52,116,000)

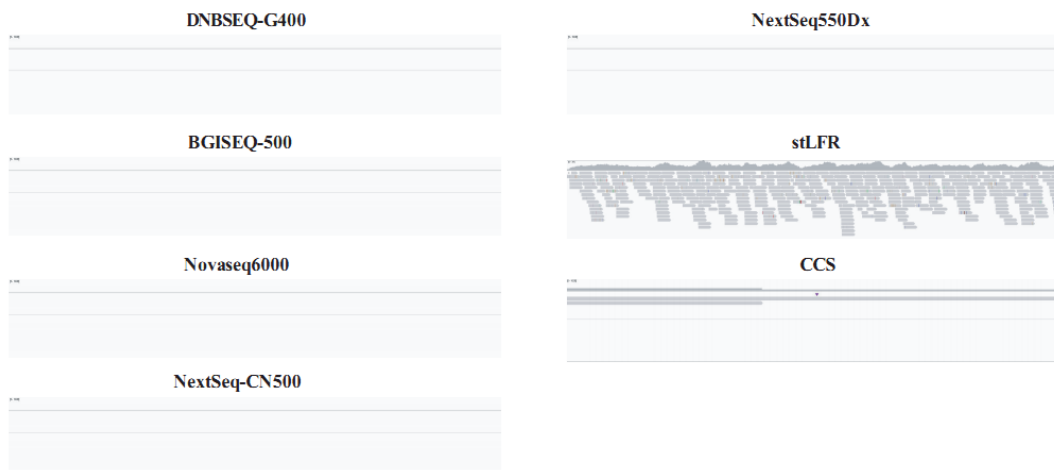

Supplementary Figure S7. IGV views XAGE2 gene for each platform.

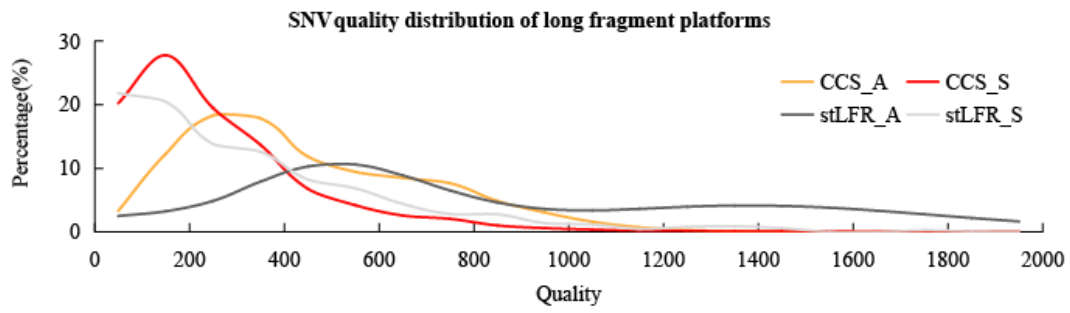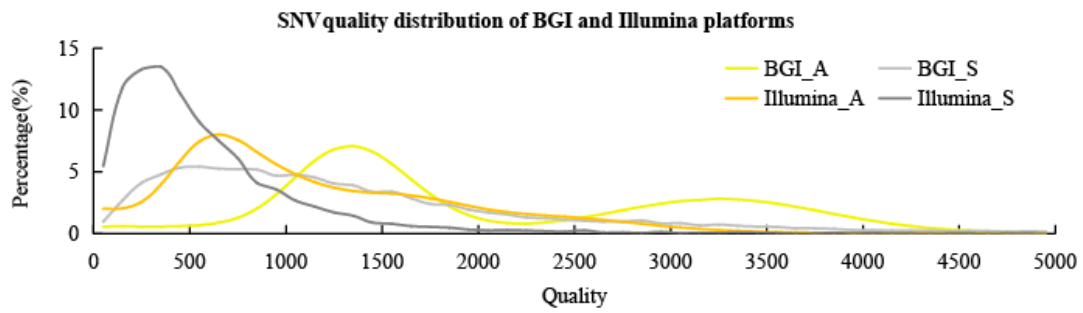

**Supplementary Figure S8. All and platform unique SNV quality distribution for long fragment(A) and short fragment platforms(B).** lines with tag “\_A” indicates all SNV, “\_S” means those unique.

**Supplementary Table S1-1. Data information of each platforms.**

|                              | BGISEQ-500       |                  |                  | DNBSEQ-G400      |                  |                  |
|------------------------------|------------------|------------------|------------------|------------------|------------------|------------------|
|                              | 1                | 2                | 3                | 1                | 2                | 3                |
| Clean reads                  | 2,835,787,762.00 | 2,705,531,402.00 | 2,366,532,060.00 | 3,025,576,552.00 | 2,947,464,316.00 | 2,895,152,490.00 |
| Clean bases (Mb)             | 283,578.78       | 270,553.14       | 236,653.21       | 302,557.66       | 294,746.43       | 289,515.25       |
| Mapping rate (%)             | 99.97            | 99.95            | 99.96            | 99.98            | 99.98            | 99.98            |
| Unique rate (%)              | 87.89            | 88.99            | 88.91            | 87.28            | 88.44            | 87.84            |
| Duplicate rate (%)           | 8.47             | 7.37             | 7.39             | 9.16             | 8.02             | 8.57             |
| Mismatch rate (%)            | 0.22             | 0.21             | 0.19             | 0.25             | 0.28             | 0.28             |
| Average sequencing depth (X) | 87.50            | 84.52            | 73.86            | 92.77            | 91.57            | 89.25            |
| Coverage (%)                 | 99.93            | 99.92            | 99.92            | 99.93            | 99.93            | 99.92            |
| Coverage at least 4X (%)     | 99.88            | 99.88            | 99.88            | 99.89            | 99.89            | 99.88            |
| Coverage at least 10X (%)    | 99.82            | 99.81            | 99.79            | 99.82            | 99.82            | 99.81            |
| Coverage at least 20X (%)    | 99.67            | 99.65            | 99.59            | 99.69            | 99.69            | 99.65            |
| SNV_number                   | 3,731,347.00     | 3,722,674.00     | 3,712,120.00     | 3,685,587.00     | 3,696,424.00     | 3,707,393.00     |
| indel_number                 | 958,346.00       | 961,643.00       | 954,785.00       | 958,497.00       | 962,494.00       | 958,369.00       |

**Supplementary Table S1-2. Data information of each platforms.**

|                              | NextSeq-CN500    |                  |                  | NextSeq550Dx     |                  |                  |
|------------------------------|------------------|------------------|------------------|------------------|------------------|------------------|
|                              | 1                | 2                | 3                | 1                | 2                | 3                |
| Clean reads                  | 1,312,748,450.00 | 1,257,851,333.00 | 1,151,358,700.00 | 1,736,721,953.00 | 1,751,990,056.00 | 1,561,010,158.00 |
| Clean bases (Mb)             | 196,912.27       | 188,677.70       | 172,703.80       | 262,245.01       | 259,721.10       | 231,618.38       |
| Mapping rate (%)             | 100.00           | 99.68            | 99.68            | 99.77            | 99.78            | 99.81            |
| Unique rate (%)              | 86.94            | 87.89            | 86.32            | 87.57            | 88.45            | 88.19            |
| Duplicate rate (%)           | 7.92             | 7.02             | 9.08             | 9.05             | 8.29             | 8.57             |
| Mismatch rate (%)            | 0.55             | 0.55             | 0.52             | 0.43             | 0.43             | 0.41             |
| Average sequencing depth (X) | 56.97            | 55.10            | 50.22            | 77.61            | 79.02            | 70.30            |
| Coverage (%)                 | 99.93            | 99.93            | 99.93            | 99.93            | 99.93            | 99.93            |
| Coverage at least 4X (%)     | 99.86            | 99.86            | 99.85            | 99.89            | 99.89            | 99.88            |
| Coverage at least 10X (%)    | 99.67            | 99.67            | 99.64            | 99.81            | 99.81            | 99.79            |
| Coverage at least 20X (%)    | 98.67            | 98.49            | 98.16            | 99.59            | 99.60            | 99.53            |
| SNV_number                   | 3,728,556.00     | 3,731,429.00     | 3,737,799.00     | 3,753,140.00     | 3,733,708.00     | 3,755,283.00     |
| indel_number                 | 728,748.00       | 711,141.00       | 739,453.00       | 781,824.00       | 794,458.00       | 784,894.00       |

**Supplementary Table S1-3. Data information of each platforms.**

|             | NovaSeq6000      |                  |                  | co-barcoding     | Pacbio       |
|-------------|------------------|------------------|------------------|------------------|--------------|
|             | 1                | 2                | 3                | stLFR            | CCS          |
| Clean reads | 1,289,631,254.00 | 1,199,680,727.00 | 1,294,029,261.00 | 2,507,844,034.00 | 6,409,943.00 |



|                              |              |              |              |              |              |
|------------------------------|--------------|--------------|--------------|--------------|--------------|
| Clean bases (Mb)             | 193,444.69   | 179,952.11   | 194,104.39   | 250,784.40   | 77,229.46    |
| Mapping rate (%)             | 99.88        | 99.91        | 99.92        | 98.86        | 100.00       |
| Unique rate (%)              | 77.47        | 77.60        | 76.49        | 65.05        | 99.82        |
| Duplicate rate (%)           | 19.28        | 19.16        | 20.31        | 33.66        | 0.00         |
| Mismatch rate (%)            | 0.24         | 0.26         | 0.24         | 0.00         | 0.00         |
| Average sequencing depth (X) | 51.83        | 48.24        | 51.32        | 51.97        | 24.40        |
| Coverage (%)                 | 99.90        | 99.91        | 99.91        | 98.86        | 93.18        |
| Coverage at least 4X (%)     | 99.84        | 99.84        | 99.84        | 98.72        | 92.83        |
| Coverage at least 10X (%)    | 99.71        | 99.71        | 99.73        | 98.34        | 90.18        |
| Coverage at least 20X (%)    | 98.69        | 98.23        | 98.68        | 96.61        | 62.55        |
| SNV_number                   | 3,751,598.00 | 3,716,984.00 | 3,734,579.00 | 3,874,599.00 | 3,795,024.00 |
| indel_number                 | 944,658.00   | 943,428.00   | 944,173.00   | 822,307.00   | 797,206.00   |

**Supplementary Table S2. Statistics of blind zones.**

| Sample          | of blind zone | Length of blind zone | Ratio of blind zone | Max length | Mean length | 1-100bp Rate | >100bp Rate | Repeat rate | LowComplexity Rate | Mappability Rate |
|-----------------|---------------|----------------------|---------------------|------------|-------------|--------------|-------------|-------------|--------------------|------------------|
| Common          | 51612         | 44414692             | 1.531361492         | 171822     | 860         | 43.88320546  | 56.11679454 | 28.06       | 3.55               | 63.58            |
| BGISEQ-500-1    | 86531         | 56313296             | 1.941610064         | 191591     | 650         | 46.87915314  | 53.12084686 | 29.57       | 4.44               | 59.91            |
| BGISEQ-500-2    | 88532         | 55809196             | 1.924229344         | 187034     | 630         | 48.99471378  | 51.00528622 | 29.61       | 4.55               | 59.69            |
| BGISEQ-500-3    | 91721         | 56667668             | 1.953828355         | 187034     | 617         | 49.5698913   | 50.4301087  | 29.7        | 4.57               | 59.36            |
| DNBSEQ-G400-1   | 84899         | 55945722             | 1.928936585         | 187034     | 658         | 46.66839421  | 53.33160579 | 29.52       | 4.38               | 60.12            |
| DNBSEQ-G400-2   | 86376         | 55242444             | 1.904688464         | 186504     | 639         | 48.74270631  | 51.25729369 | 29.47       | 4.45               | 60.07            |
| DNBSEQ-G400-3   | 87463         | 55712134             | 1.920882771         | 186480     | 636         | 48.52223226  | 51.47776774 | 29.74       | 4.58               | 59.72            |
| NextSeq550Dx-1  | 83478         | 50647655             | 1.746266045         | 191340     | 606         | 57.32887707  | 42.67112293 | 28.18       | 4.78               | 60.51            |
| NextSeq550Dx-2  | 82407         | 49566962             | 1.709005139         | 186428     | 601         | 58.15646729  | 41.84353271 | 28.06       | 4.85               | 60.39            |
| NextSeq550Dx-3  | 89348         | 49892509             | 1.720229581         | 191283     | 558         | 61.03662085  | 38.96337915 | 28.07       | 4.93               | 60.01            |
| NextSeq-CN500-1 | 114603        | 58055997             | 2.001696155         | 191434     | 506         | 59.23754177  | 40.76245823 | 28.96       | 5.58               | 58.48            |
| NextSeq-CN500-2 | 113902        | 58131009             | 2.004282472         | 191558     | 510         | 59.32029288  | 40.67970712 | 28.91       | 5.44               | 58.45            |
| NextSeq-CN500-3 | 103920        | 55262351             | 1.905374832         | 191311     | 531         | 60.31947652  | 39.68052348 | 28.62       | 5.63               | 58.71            |
| NovaSeq6000-1   | 66490         | 54766189             | 1.888267804         | 186495     | 823         | 38.23432095  | 61.76567905 | 29.29       | 4.31               | 59.78            |
| NovaSeq6000-2   | 65357         | 53158741             | 1.832845063         | 187034     | 813         | 41.36358768  | 58.63641232 | 29.05       | 4.22               | 59.73            |
| NovaSeq6000-3   | 64218         | 53005900             | 1.827575301         | 186471     | 825         | 40.68018313  | 59.31981687 | 29.12       | 4.32               | 59.77            |

**Supplementary Table S3. Information of blind zones.**

| Chrom | Blind zones length | Chrom length | Ratio(%) |
|-------|--------------------|--------------|----------|
| 1     | 3,060,143          | 249,250,621  | 1.23     |
| 2     | 1,748,941          | 243,199,373  | 0.72     |

|    |           |             |      |
|----|-----------|-------------|------|
| 3  | 457,106   | 198,022,430 | 0.23 |
| 4  | 704,697   | 191,154,276 | 0.37 |
| 5  | 1,743,794 | 180,915,260 | 0.96 |
| 6  | 566,981   | 171,115,067 | 0.33 |
| 7  | 1,624,082 | 159,138,663 | 1.02 |
| 8  | 1,082,236 | 146,364,022 | 0.74 |
| 9  | 5,077,275 | 141,213,431 | 3.60 |
| 10 | 1,799,872 | 135,534,747 | 1.33 |
| 11 | 560,946   | 135,006,516 | 0.42 |
| 12 | 334,952   | 133,851,895 | 0.25 |
| 13 | 146,952   | 115,169,878 | 0.13 |
| 14 | 250,485   | 107,349,540 | 0.23 |
| 15 | 1,498,743 | 102,531,392 | 1.46 |
| 16 | 1,441,022 | 90,354,753  | 1.59 |
| 17 | 815,769   | 81,195,210  | 1.00 |
| 18 | 93,484    | 78,077,248  | 0.12 |
| 19 | 410,028   | 59,128,983  | 0.69 |
| 20 | 218,335   | 63,025,520  | 0.35 |
| 21 | 410,743   | 48,129,895  | 0.85 |
| 22 | 682,048   | 51,304,566  | 1.33 |
| X  | 2,959,833 | 155,270,560 | 1.91 |
| Y  | 5,927,949 | 59,373,566  | 9.98 |

**Supplementary Table S4. Phasing statistic for PacBio HiFi CCS and stLFR data.**

|                     | CCS      | stLFR    |
|---------------------|----------|----------|
| Length(bp)          | 30403236 | 32519955 |
| Percentage (%)      | 68.53    | 73.3     |
| UTR3                | 61       | 155      |
| UTR5                | 13       | 44       |
| Downstream          | 348      | 421      |
| exonic              | 397      | 441      |
| Exonic;Splicing     | 1        | 1        |
| Intergenic          | 16480    | 29512    |
| NcRNA_intronic      | 5220     | 6489     |
| NcRNA_exonic        | 416      | 517      |
| NcRNA_intronic      | 3100     | 5866     |
| NcRNA_splicing      | 2        | 8        |
| NcRNA_splicing      | 1        | 3        |
| Upstream            | 471      | 448      |
| Upstream;Downstream | 14       | 7        |

**Supplementary Table S5. Statistics of Allele frequency less than 1% in 1000 Genome database.**

| Population  | Blind zones (%) | UMRs (%) |
|-------------|-----------------|----------|
| Chinese     | 35.64           | 52.81    |
| Asian       | 42.97           | 62.38    |
| 1000 Genome | 67.27           | 83.24    |

**Supplementary Table S6. SNV and SNV density detected in blind zones and UMRs.**

| Region      | Type   | Chinese    | East Asian | 1000 Genome |
|-------------|--------|------------|------------|-------------|
| Blind zones | SNV    | 21,266     | 24,453     | 59,285      |
|             | SNV/Kb | 0.596      | 0.685      | 1.661       |
| UMRs        | SNV    | 19,277,139 | 24,409,408 | 84,742,595  |
|             | SNV/Kb | 6.3        | 7.977      | 27.694      |
